# Supplementary material
Source: PubMed Central journal article supplement (PMC4353895)
Supplement: supp_czu012_czu012_Chinese.pdf [file supp_czu012_czu012_Chinese.pdf]

环境因素是否能作为理解在布基纳法索生育政策在不同地区效果不同的主要因素？

布基纳法索实施了一项针对紧急产科和新生儿医疗的全国性补助（EmONC）政策，这项补助涵盖了在公立医院进行正常妊娠费用的 80%。这个补助的目的在于增加在医疗机构的妊娠。在实施了这项补助之后，总体来说在全国范围内医疗机构的妊娠覆盖率得到了提高，但是在不同地区和不同的基础医疗中心发现了增长不一致。为了探究这种不一致产生的原因，我们检验了一个地区六家不同基础医疗中心的环境因素和它们对 EmONC 实施的情况。为此我们开展了一项有对照的多案例研究。在调查中，我们采访了女性（n=71），传统接生员（n=7），诊所管理委员会（n=11），医护人员和地区医疗管理人员（n=26）。在这些被调查者中我们进行了焦点小组访谈（n=62）。在六家基础医疗中心中，我们还使用了观察法。观察发现这六家机构对补助的实施几乎是相同的，导致医疗机构妊娠覆盖率提高不同的是环境和人造因素。在 Nogo 和 Tara 这两个地方的医疗中心里，覆盖率的迅速提高主要是归功于医疗工作者在有创意得宣传医疗机构妊娠和与社区人员加强信任中体现出的领导力，用户对医疗质量的积极感知以及女性专业医护人员的加入。Iata 地区医护团队的改变和 Belem 地区对在家中妊娠的罚款延迟了这项补助政策的效果体现。最后，Fati 和 Mata 这两个地区的医疗中心使用情况保持不变主要是由于缺乏对医疗机构妊娠的宣传，用户对医疗服务质量的消极感知，以及医护人员和用户之间的矛盾。因此在实施政策之前，决策者应该先进行试点研究，使政策能够与环境 and 人为因素相适应。
