# Supplementary material
Source: PubMed Central journal article supplement (PMC4353895)
Supplement: supp_czu012_czu012_French.pdf [file supp_czu012_czu012_French.pdf]

# Les facteurs contextuels, éléments clés pour comprendre l'hétérogénéité des effets des mesures prises pour la santé maternelle au Burkina Faso

Accepté le 4 février 2014

Le Burkina Faso a mis en place une subvention nationale pour les urgences obstétricales et néonatales couvrant environ 80% du coût d'un accouchement normal au sein d'institutions publiques. L'objectif est d'augmenter la couverture des accouchements dans ces institutions. Après l'application des mesures d'urgences obstétricales et néonatales, la couverture a augmenté à travers le pays, mais des disparités ont été observées entre les districts et entre les centres de soins de santé primaires (SSP). Pour comprendre les différences de couverture, nous avons analysé les facteurs contextuels et la mise en place d'urgences obstétricales et néonatales dans six SSP d'un même district. Nous avons mené une étude de cas multiples contrastés. Des entretiens ont été organisés avec des femmes (n/471), celles qui ont accouché normalement (n/47), des comités de direction de cliniques (n/11), et des membres du personnel de santé ainsi que des responsables de la santé au niveau du district (n/26). Des groupes de discussions (n/62) ont aussi été organisés au niveau des communautés. Un certain nombre de constats a été fait dans ces six SSP. L'application s'y est faite de manière homogène mais les facteurs contextuels et humains expliquent vraisemblablement les différences observées au niveau de la couverture des accouchements en institution. Dans les SSP de Nogo et Tara, l'augmentation immédiate de la couverture est due à la créativité du personnel de santé à promouvoir les accouchements en institution, à leur capacité à renforcer leur relation de confiance avec les communautés, à véhiculer une image positive de la qualité des services et l'arrivée de femmes au sein du personnel de santé. Le changement d'équipe au SSP de Iata et les amendes imposées à Belém pour toutes naissances à domicile sont sans doute la cause du retard pris. Au final, la couverture inchangée des SSP de Fati et Mata est probablement due au manque de communication de la part des institutions, d'une perception négative de la qualité des soins par les patients et de conflits entre le personnel de santé et les patients. Avant de mettre en œuvre quelconques mesures, ceux qui prennent les décisions devraient effectuer des périodes tests pour adapter les mesures prises en fonction des facteurs humains et contextuels.

Mots clés : Mesure de santé maternelle, soins gratuits, hétérogénéité des effets, étude qualitative, étude de cas, Burkina Faso
