# Supplementary material
Source: PubMed Central journal article supplement (PMC4353895)
Supplement: supp_czu012_czu012_Spanish.pdf [file supp_czu012_czu012_Spanish.pdf]

# **Los factores contextuales como una clave para comprender la heterogeneidad de los efectos de una política de salud materna en Burkina Faso?**

**Loubna Belaid y Valéry Ridde**

**Aceptado** 4 de febrero de 2014

Burkina Faso puso en práctica un subsidio nacional para los cuidados obstétricos y neonatales de emergencia (CONEm) que cubre el 80 % del costo de un parto normal en los centros de salud pública. El objetivo era aumentar la cobertura de partos institucionales. Después de la implementación de la política CONEm, la cobertura aumentó en todo el país, pero no se observaron diferencias entre los distritos y entre los centros de atención primaria de salud (CAPS). Para entender la variación en la cobertura, se evaluaron los factores contextuales y la implementación de CONEm en seis CAPS en un distrito. Se realizó un estudio contrastado de múltiples casos. Entrevistamos a mujeres (n=71), parteras tradicionales (n=7), comités administrativos de clínicas (n=11), y trabajadores de salud y gerentes de salud distritales (n=26). Los grupos focales (n=62) se llevaron a cabo dentro de las comunidades. Las observaciones se llevaron a cabo en los seis CAPS. La implementación fue casi homogénea en los seis CAPS, pero los contextos y factores humanos parecían explicar las variaciones observadas en la cobertura de partos institucionales. En los CAPS de Nogo y Tara, el aumento inmediato de la cobertura se atribuyó al liderazgo de los trabajadores de salud en la promoción creativa de los partos institucionales y el fortalecimiento de relaciones de confianza con las comunidades, las percepciones positivas de los usuarios de la calidad de la atención y la llegada de personal profesional femenino. El cambio de equipo de atención médica en el CAPS de Iata y una multa impuesta por los partos en casa en Belem pudo haber causado los efectos atrasados allí. Por último, la falta de cambios en la cobertura en los CAPS de Fati y Mata fue probablemente debida a la falta de promoción de los partos institucionales, las percepciones negativas de los usuarios de la calidad de la atención, y los conflictos entre los trabajadores de salud y los usuarios. Antes de la implementación, los responsables deben realizar estudios piloto para adaptar las políticas de acuerdo a los contextos y los factores humanos.

## **Palabras Claves**

Política de salud materna, atención gratuita, heterogeneidad de los efectos, estudio cualitativo, estudio de caso, Burkina Faso

## **MENSAJES CLAVES**

- La calidad percibida de la atención debe ser mejorada para aumentar el éxito de las políticas de salud.
- Las interacciones entre los trabajadores de salud y las mujeres deben ser más humanizadas.
- Una gruesa descripción del contexto de la implementación de políticas de salud sigue siendo fundamental para entender cómo se producen los efectos.
- Se necesitan más estudios para comprender la heterogeneidad de los efectos en el contexto de la eliminación de las políticas de tarifas para los usuarios.
